# Supplementary material
Source: publisher site journal article supplement (https://www.dovepress.com/article/455862)
Supplement: Supplementary file 1 [file get_supplementary_file.php]

**Supplementary materials**

**Supplementary Figure:**


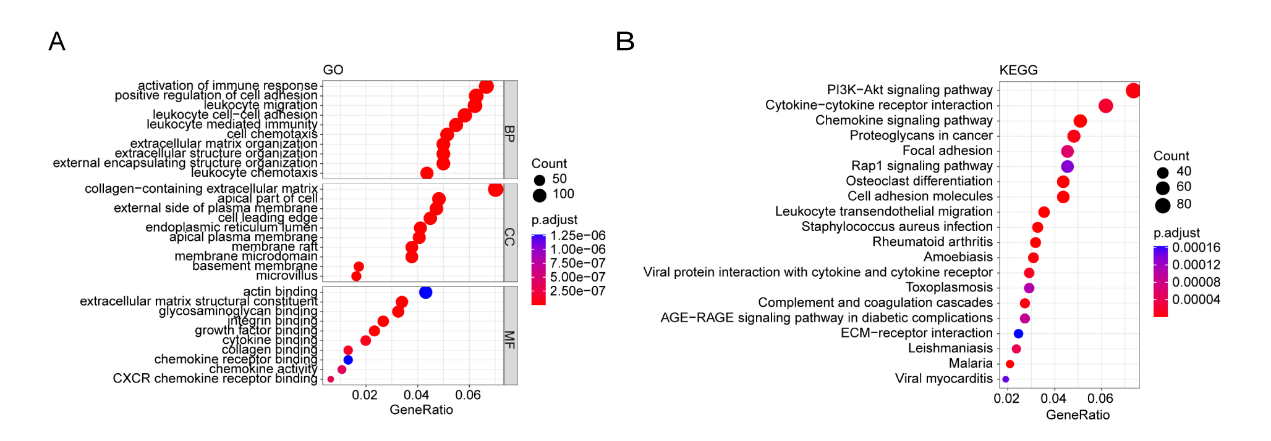


**Supplementary Figure 1** Enrichment analysis of the UC-related DEGs.(**A**) GO analysis displaying the relevant biological processes (BP), cellular components (CC), molecular functions (MF) in GSE206285 DEGs. (**B**) KEGG analysis displaying the enriched associated signaling pathways in GSE206285 DEGs.


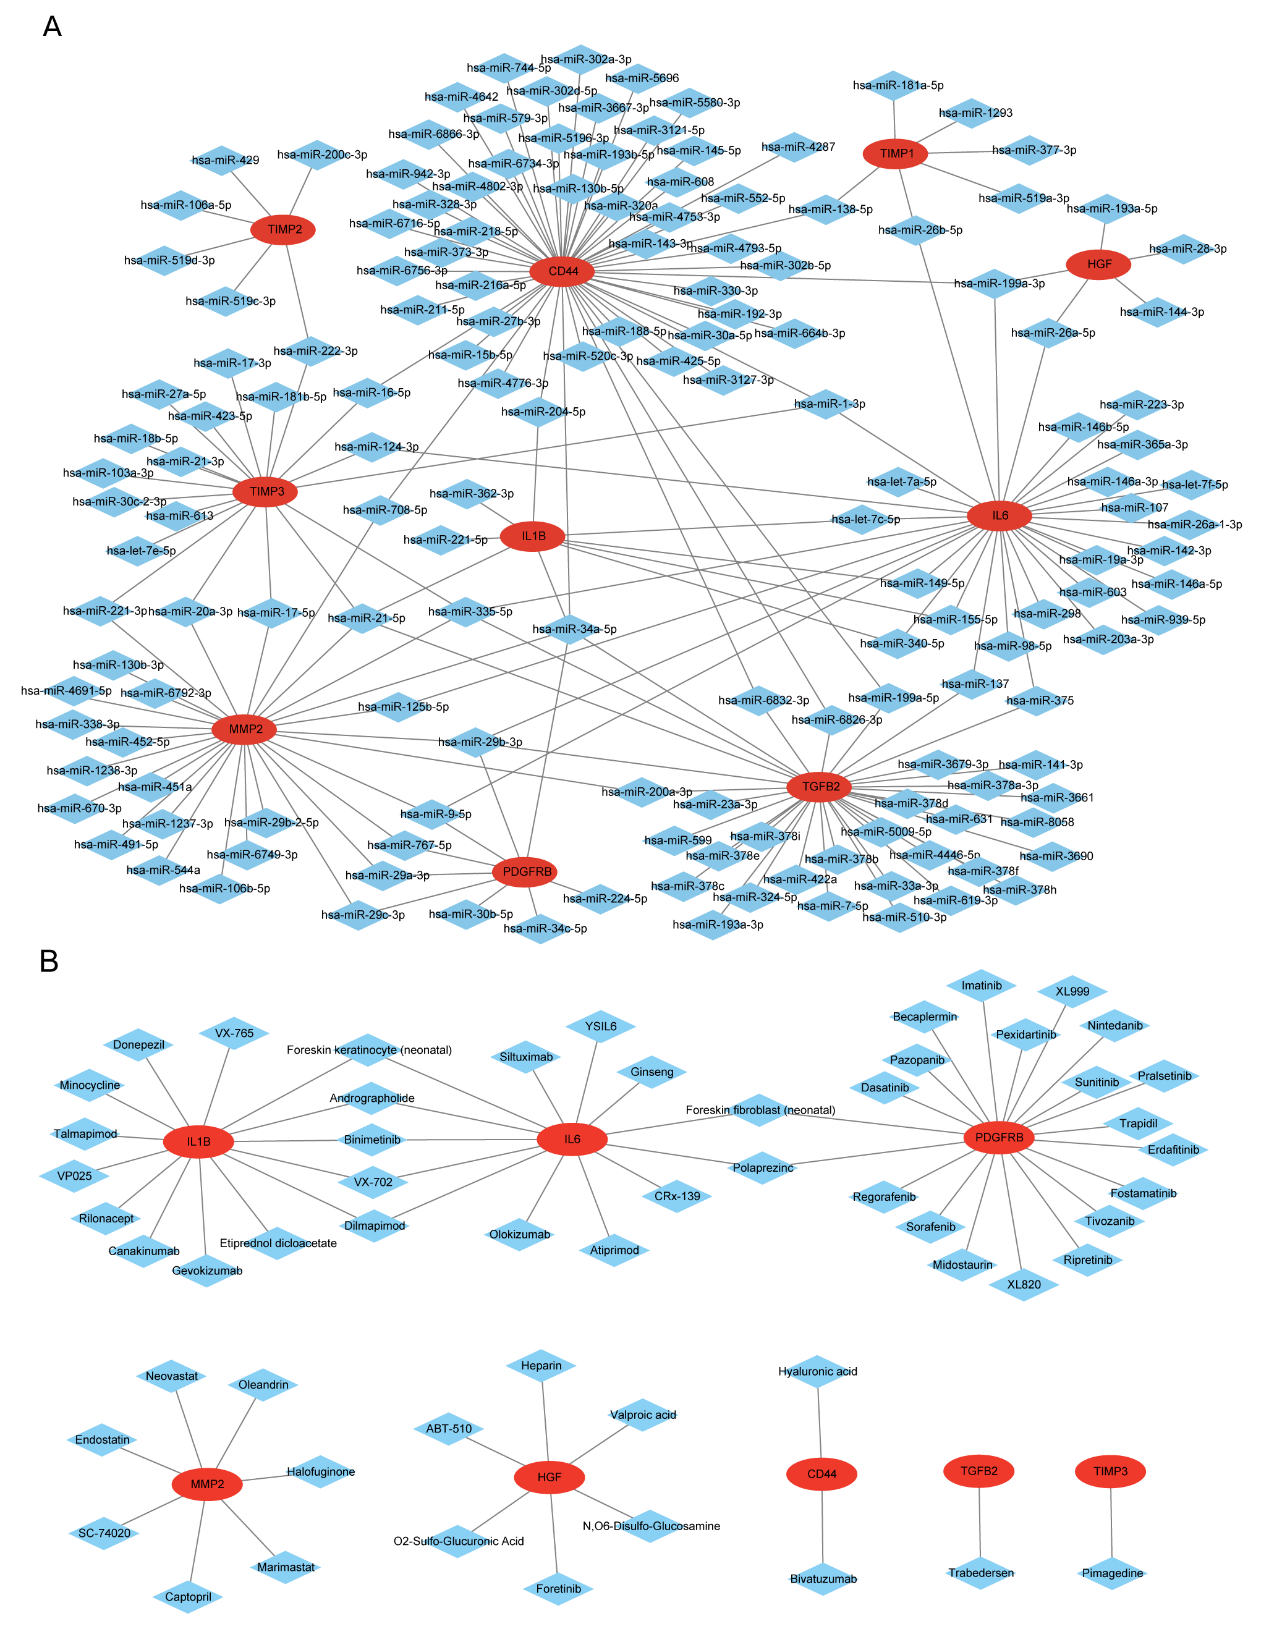


**Supplementary Figure 2** miRNA and drug interactions with the PANoptosis-related hub genes. (**A**) Prediction of miRNA and their interaction network with the PANoptosis-related hub genes. (**B**) Prediction of drug and their interaction network with the PANoptosis-related hub genes.


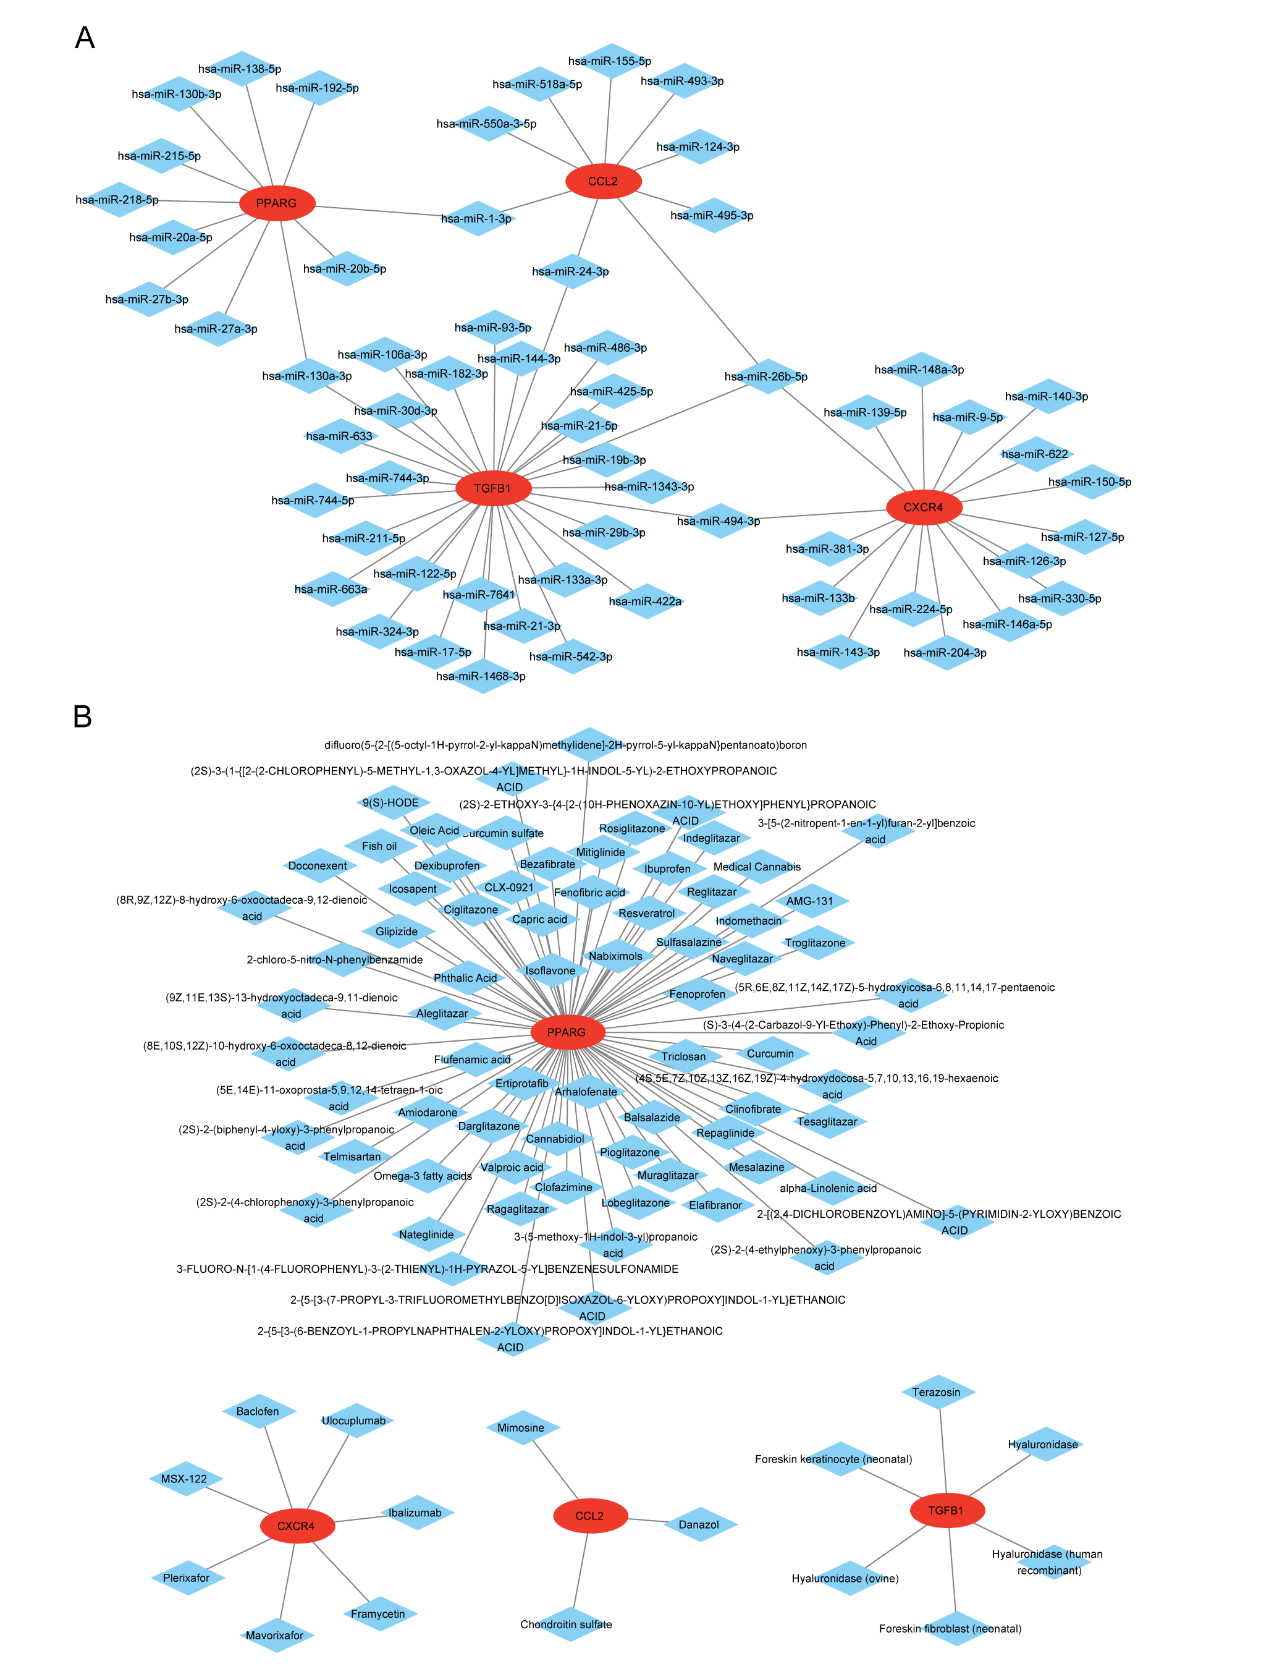


**Supplementary Figure 3** miRNA and drug interactions with the autophagy-related hub genes. (**A**) Prediction of miRNA and their interaction network with the autophagy-related hub genes. (**B**) Prediction of drug and their interaction network with the autophagy-related hub genes.


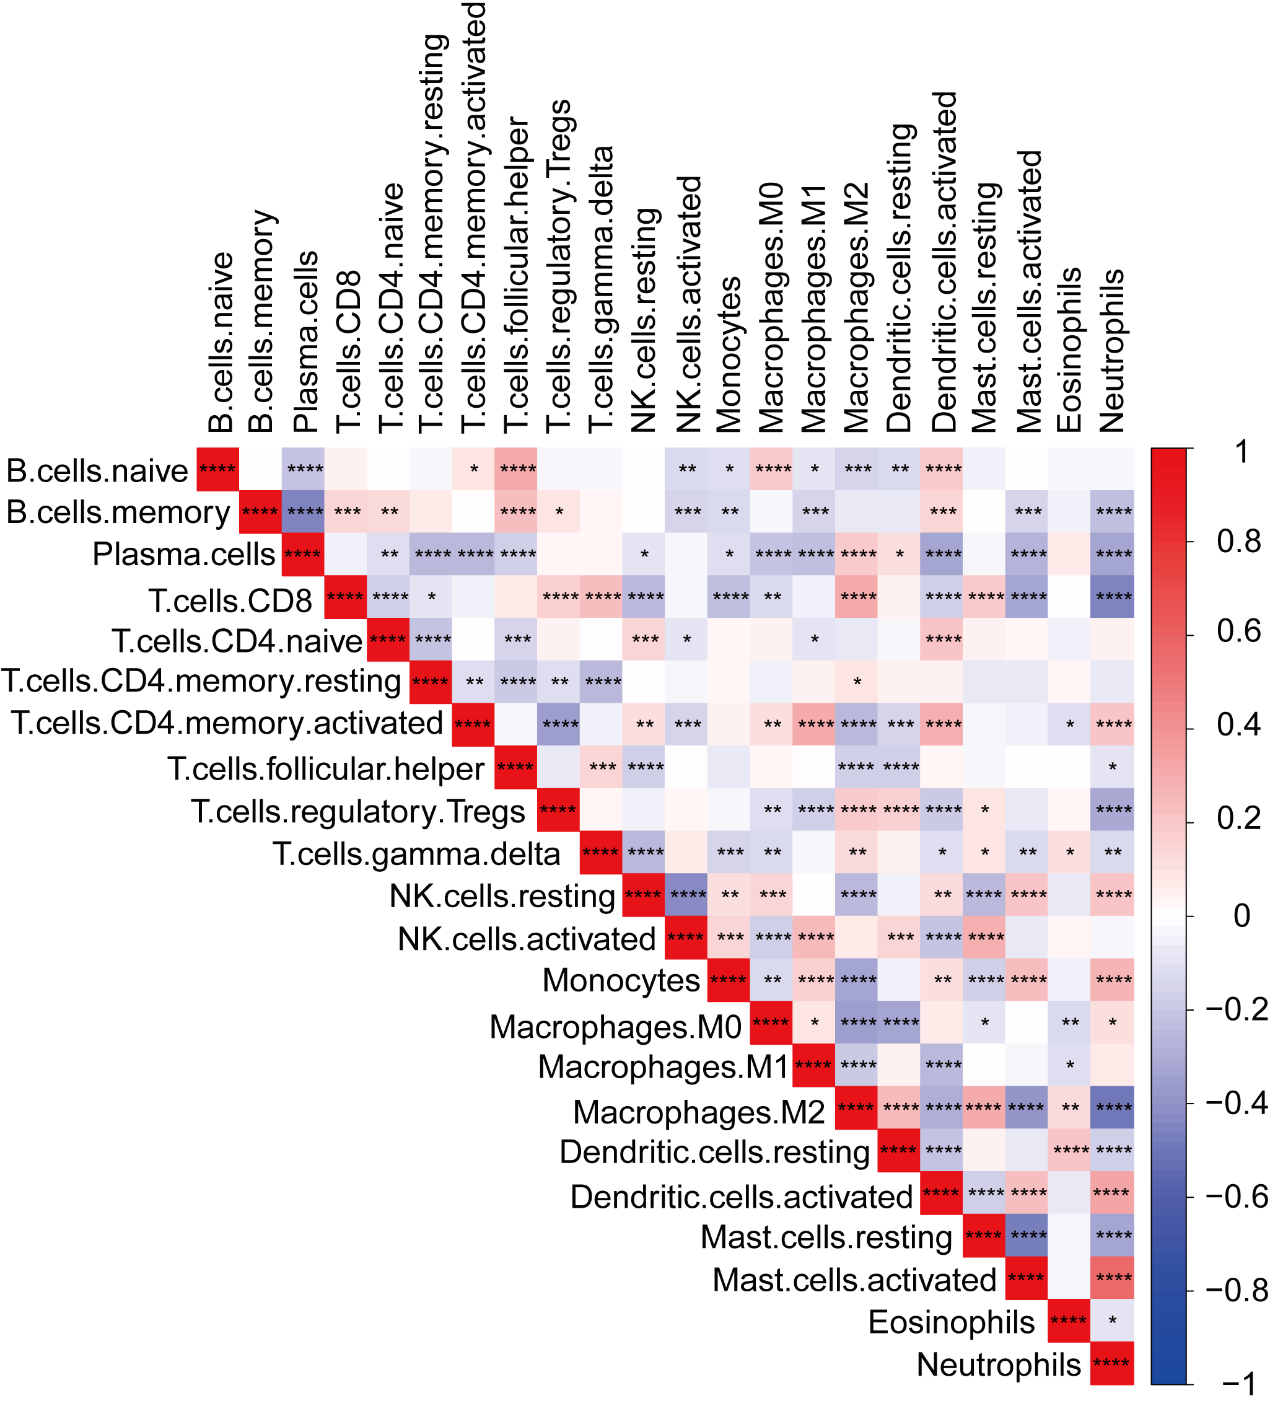


**Supplementary Figure 4** The heatmap of the correlation among 22 distinct immune infiltrating cells types. Colored squares indicate the strength of correlation. *p < 0.05; **p < 0.01; ***p < 0.001; ****p < 0.0001.


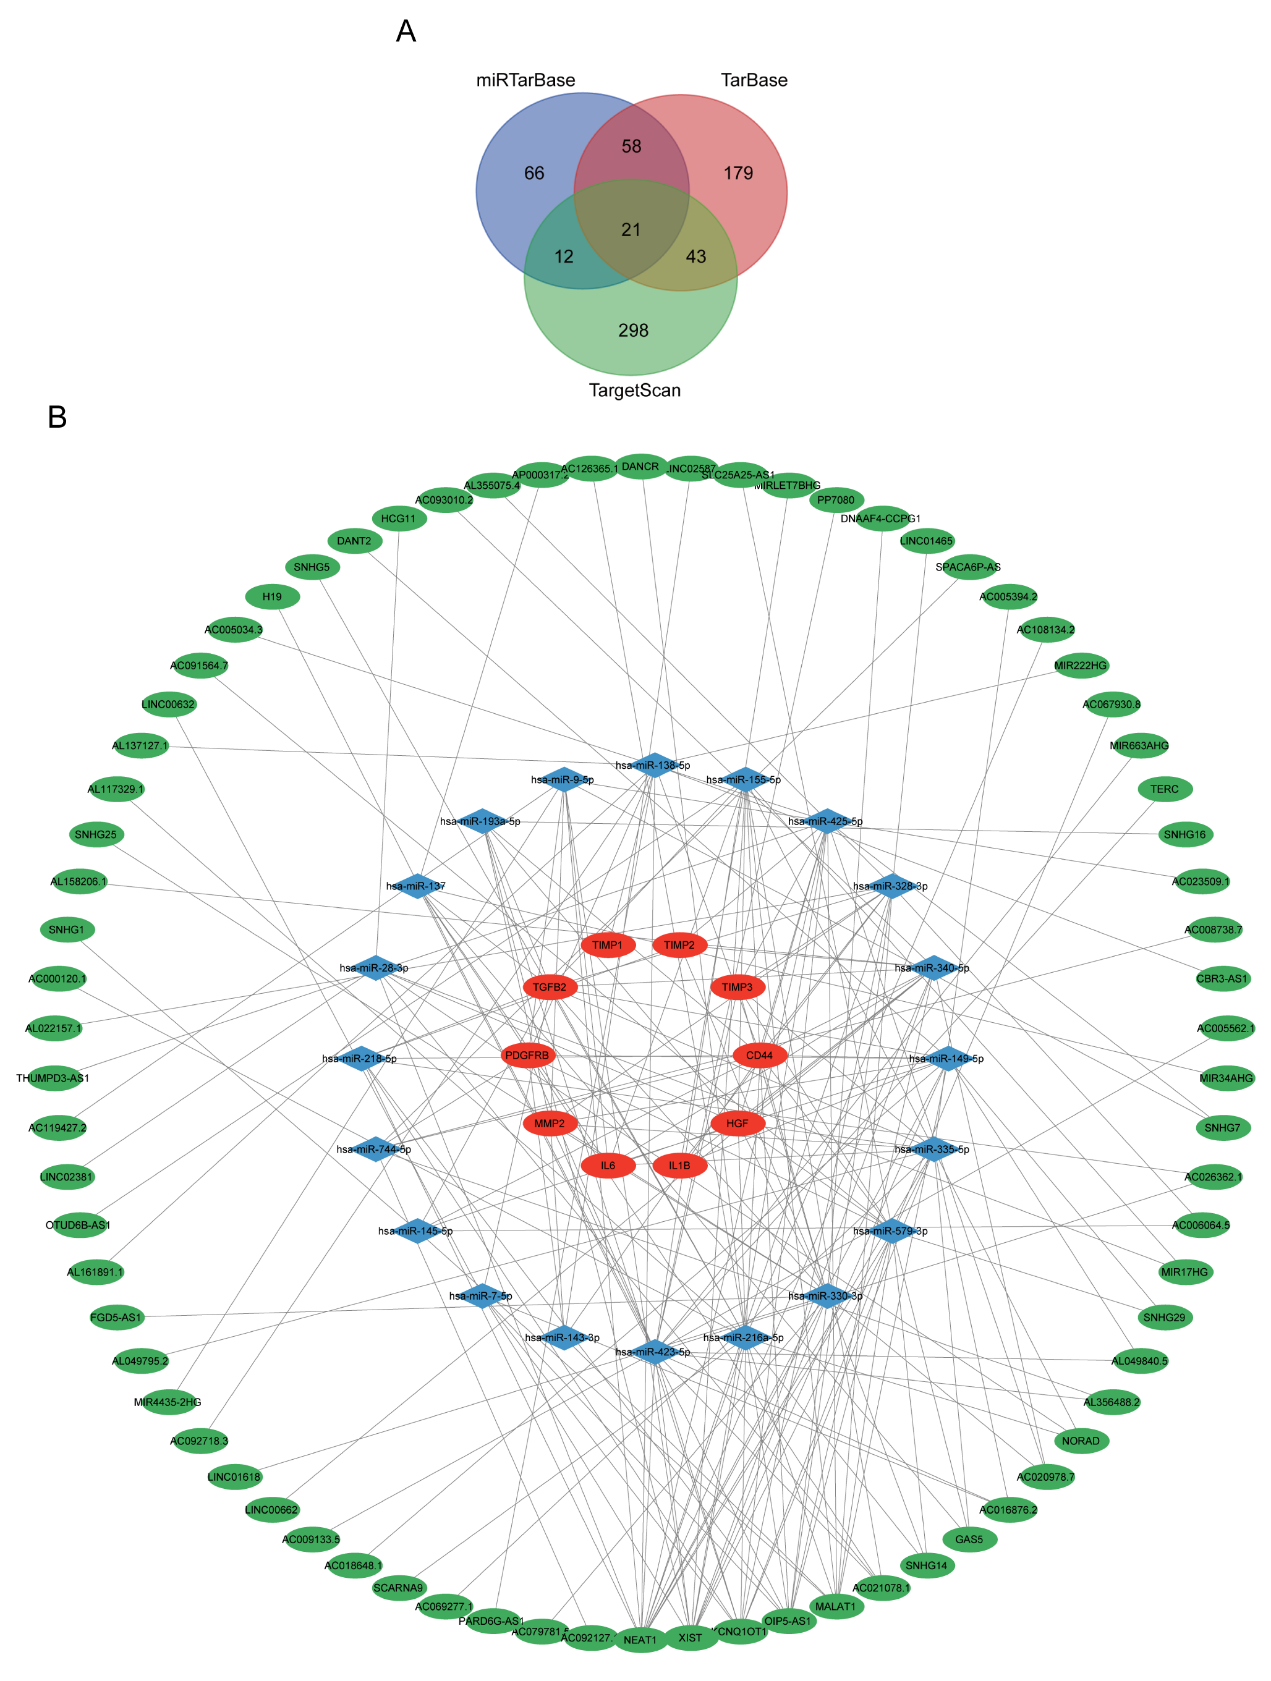


**Supplementary Figure 5** Construction of ceRNA network associated with the PANoptosis-related hub genes. (**A**) A Venn diagram of the overlapping miRNAs of the PANoptosis-related hub genes predicted by miRTarBase, TarBase and TargetScan. (**B**) The integrated lncRNA-miRNA-PANoptosis-related hub genes ceRNA network.


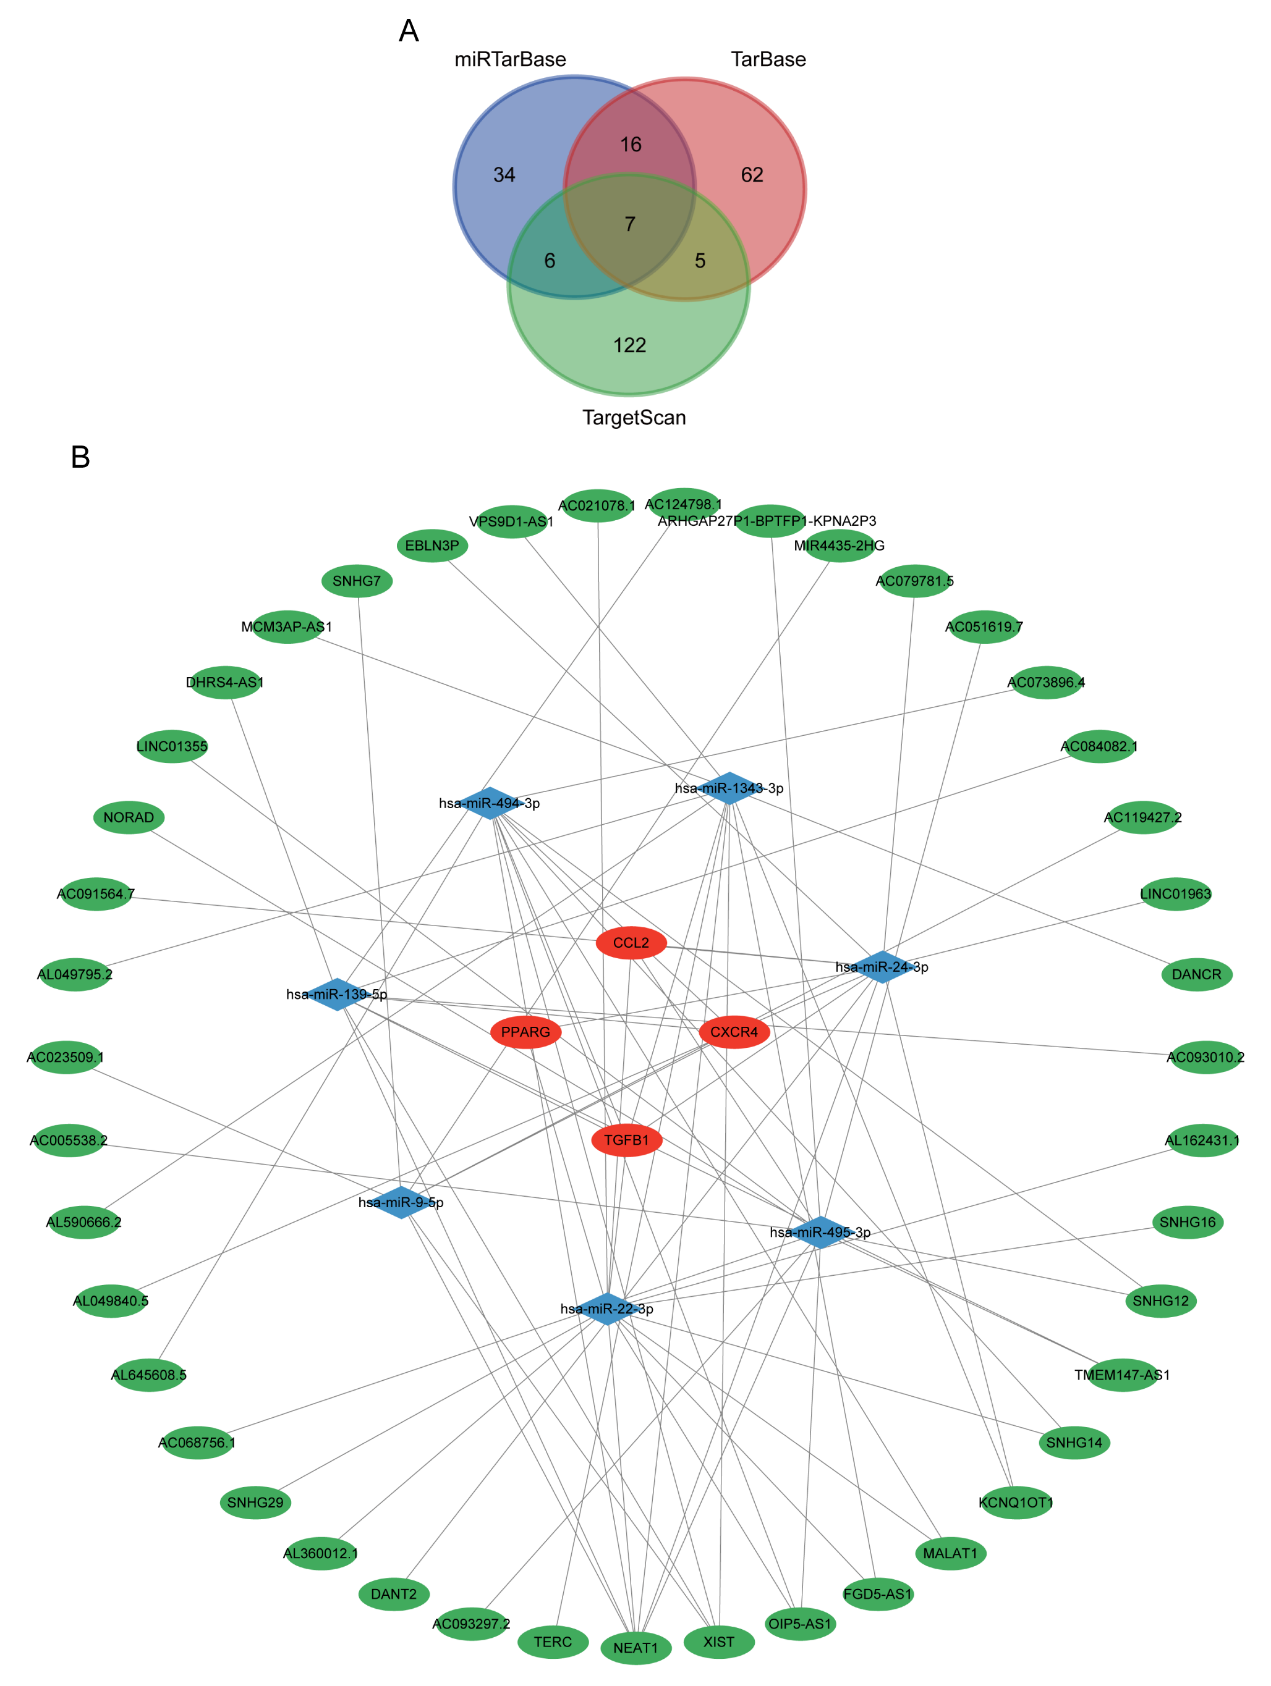


**Supplementary Figure 6** Construction of ceRNA network associated with the autophagy-related hub genes. (**A**) A Venn diagram of the overlapping miRNAs of the autophagy-related hub genes predicted by miRTarBase, TarBase and TargetScan. (**B**) The integrated lncRNA-miRNA-autophagy-related hub genes ceRNA network.


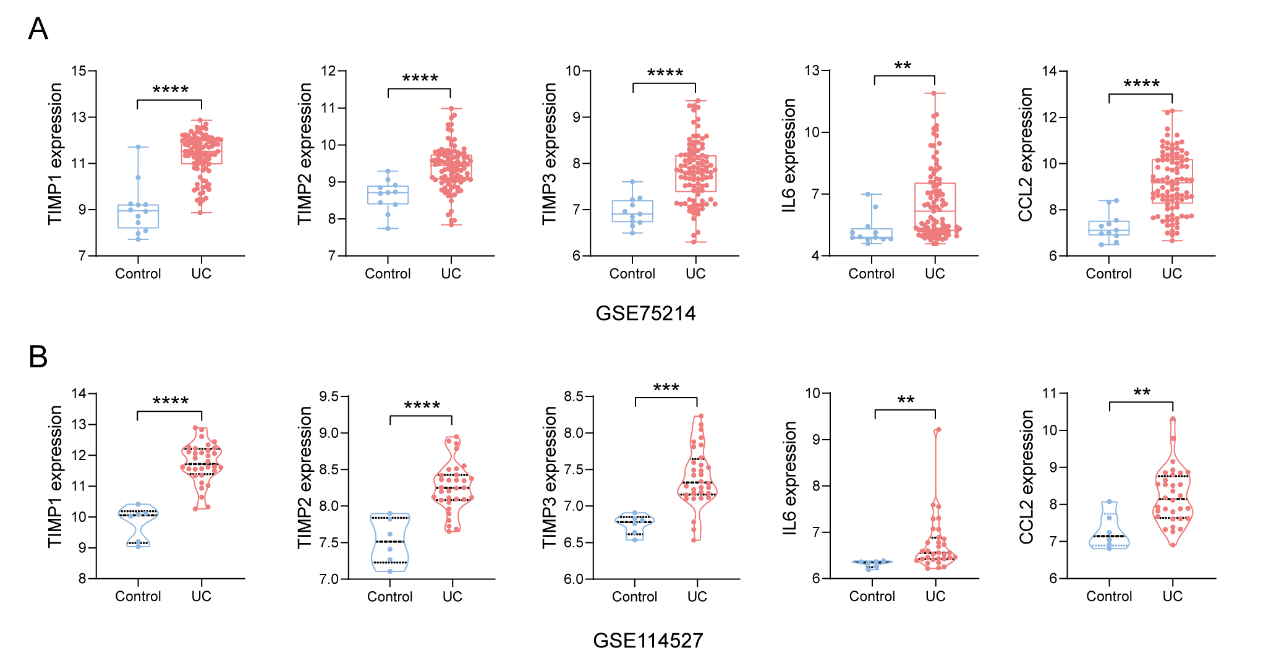


**Supplementary Figure 7** External verification of the key candidate genes. The expression of TIMP1, TIMP2, TIMP3, IL6, and CCL2 in the intestinal mucosa of healthy controls and UC patients in (**A**) GSE75214 and (**B**) GSE114527. **p < 0.01, ***p < 0.001, ****p < 0.0001.

**Supplementary Table:**

Supplementary Table 1: Summary table of PANoptosis and autophagy-related genes.

| Gene | Type |
| --- | --- |
| ADD1 | Apoptosis |
| AIFM1 | Apoptosis |
| AIFM3 | Apoptosis |
| AKT3 | Apoptosis |
| ANKH | Apoptosis |
| ANXA1 | Apoptosis |
| APAF1 | Apoptosis |
| APPL1 | Apoptosis |
| ATF3 | Apoptosis |
| AVPR1A | Apoptosis |
| BCAP31 | Apoptosis |
| BCL10 | Apoptosis |
| BCL2L1 | Apoptosis |
| BCL2L10 | Apoptosis |
| BCL2L2 | Apoptosis |
| BGN | Apoptosis |
| BID | Apoptosis |
| BIK | Apoptosis |
| BIRC3 | Apoptosis |
| BMF | Apoptosis |
| BMP2 | Apoptosis |
| BNIP3L | Apoptosis |
| BOK | Apoptosis |
| BRCA1 | Apoptosis |
| BTG2 | Apoptosis |
| BTG3 | Apoptosis |
| CASP10 | Apoptosis |
| CASP2 | Apoptosis |
| CASP7 | Apoptosis |
| CAV1 | Apoptosis |
| CCNA1 | Apoptosis |
| CCND1 | Apoptosis |
| CCND2 | Apoptosis |
| CD14 | Apoptosis |
| CD2 | Apoptosis |
| CD38 | Apoptosis |
| CD44 | Apoptosis |
| CD69 | Apoptosis |
| CDC25B | Apoptosis |
| CDK2 | Apoptosis |
| CDKN1A | Apoptosis |
| CDKN1B | Apoptosis |
| CHUK | Apoptosis |
| CLU | Apoptosis |
| CRADD | Apoptosis |
| CREBBP | Apoptosis |
| CTH | Apoptosis |
| CTNNB1 | Apoptosis |
| DAP | Apoptosis |
| DAP3 | Apoptosis |
| DCN | Apoptosis |
| DDIT3 | Apoptosis |
| DFFA | Apoptosis |
| DFFB | Apoptosis |
| DNAJA1 | Apoptosis |
| DNAJC3 | Apoptosis |
| DNM1L | Apoptosis |
| DPYD | Apoptosis |
| E2F1 | Apoptosis |
| EBP | Apoptosis |
| EGR3 | Apoptosis |
| EMP1 | Apoptosis |
| ENO2 | Apoptosis |
| ERBB2 | Apoptosis |
| ERBB3 | Apoptosis |
| EREG | Apoptosis |
| ETF1 | Apoptosis |
| F2 | Apoptosis |
| F2R | Apoptosis |
| FDXR | Apoptosis |
| FEZ1 | Apoptosis |
| GADD45A | Apoptosis |
| GADD45B | Apoptosis |
| GCH1 | Apoptosis |
| GNA15 | Apoptosis |
| GPX1 | Apoptosis |
| GPX3 | Apoptosis |
| GSN | Apoptosis |
| GSR | Apoptosis |
| GSTM1 | Apoptosis |
| GUCY2D | Apoptosis |
| H1F0 | Apoptosis |
| HGF | Apoptosis |
| HMGB2 | Apoptosis |
| HMOX1 | Apoptosis |
| HSPB1 | Apoptosis |
| IER3 | Apoptosis |
| IFITM3 | Apoptosis |
| IFNB1 | Apoptosis |
| IFNGR1 | Apoptosis |
| IGF1 | Apoptosis |
| IGF2R | Apoptosis |
| IGFBP6 | Apoptosis |
| ISG20 | Apoptosis |
| JUN | Apoptosis |
| KRT18 | Apoptosis |
| LGALS3 | Apoptosis |
| LMNA | Apoptosis |
| LUM | Apoptosis |
| LY96 | Apoptosis |
| MADD | Apoptosis |
| MCL1 | Apoptosis |
| MGMT | Apoptosis |
| MMP2 | Apoptosis |
| NEDD9 | Apoptosis |
| NEFH | Apoptosis |
| PAK1 | Apoptosis |
| PDCD4 | Apoptosis |
| PDGFRB | Apoptosis |
| PEA15 | Apoptosis |
| PLAT | Apoptosis |
| PLCB2 | Apoptosis |
| PLPPR4 | Apoptosis |
| PMAIP1 | Apoptosis |
| PPP2R5B | Apoptosis |
| PPP3R1 | Apoptosis |
| PPT1 | Apoptosis |
| PRF1 | Apoptosis |
| PSEN1 | Apoptosis |
| PSEN2 | Apoptosis |
| PTK2 | Apoptosis |
| RARA | Apoptosis |
| RELA | Apoptosis |
| RETSAT | Apoptosis |
| RHOB | Apoptosis |
| RHOT2 | Apoptosis |
| RNASEL | Apoptosis |
| ROCK1 | Apoptosis |
| SAT1 | Apoptosis |
| SATB1 | Apoptosis |
| SC5D | Apoptosis |
| SLC20A1 | Apoptosis |
| SMAD7 | Apoptosis |
| SOD1 | Apoptosis |
| SOD2 | Apoptosis |
| SPTAN1 | Apoptosis |
| TAP1 | Apoptosis |
| TFDP1 | Apoptosis |
| TGFB2 | Apoptosis |
| TGFBR3 | Apoptosis |
| TICAM1 | Apoptosis |
| TIMP1 | Apoptosis |
| TIMP2 | Apoptosis |
| TIMP3 | Apoptosis |
| TNFRSF12A | Apoptosis |
| TOP2A | Apoptosis |
| TP73 | Apoptosis |
| TSPO | Apoptosis |
| TXNIP | Apoptosis |
| UACA | Apoptosis |
| UNC5B | Apoptosis |
| VDAC2 | Apoptosis |
| WEE1 | Apoptosis |
| XIAP | Apoptosis |
| YWHAE | Apoptosis |
| YWHAG | Apoptosis |
| ALK | Necroptosis |
| APP | Necroptosis |
| ATRX | Necroptosis |
| AXL | Necroptosis |
| BACH2 | Necroptosis |
| BCL2 | Necroptosis |
| BCL2L11 | Necroptosis |
| BNIP3 | Necroptosis |
| BRAF | Necroptosis |
| CD40 | Necroptosis |
| CDKN2A | Necroptosis |
| CFLAR | Necroptosis |
| CYLD | Necroptosis |
| DDX58 | Necroptosis |
| DIABLO | Necroptosis |
| DNMT1 | Necroptosis |
| EGFR | Necroptosis |
| FADD | Necroptosis |
| FAS | Necroptosis |
| FASLG | Necroptosis |
| FLT3 | Necroptosis |
| GATA3 | Necroptosis |
| HAT1 | Necroptosis |
| HDAC9 | Necroptosis |
| HSP90AA1 | Necroptosis |
| HSPA4 | Necroptosis |
| ID1 | Necroptosis |
| IDH1 | Necroptosis |
| IDH2 | Necroptosis |
| IPMK | Necroptosis |
| ITPK1 | Necroptosis |
| KLF9 | Necroptosis |
| LEF1 | Necroptosis |
| MAP3K7 | Necroptosis |
| MAPK8 | Necroptosis |
| MLKL | Necroptosis |
| MPG | Necroptosis |
| MYC | Necroptosis |
| MYCN | Necroptosis |
| OTULIN | Necroptosis |
| PANX1 | Necroptosis |
| PLK1 | Necroptosis |
| RIPK1 | Necroptosis |
| RIPK3 | Necroptosis |
| RNF31 | Necroptosis |
| SIRT1 | Necroptosis |
| SIRT2 | Necroptosis |
| SIRT3 | Necroptosis |
| SLC39A7 | Necroptosis |
| SPATA2 | Necroptosis |
| SQSTM1 | Necroptosis |
| STAT3 | Necroptosis |
| STUB1 | Necroptosis |
| TARDBP | Necroptosis |
| TERT | Necroptosis |
| TLR3 | Necroptosis |
| TNFRSF1A | Necroptosis |
| TNFRSF1B | Necroptosis |
| TNFRSF21 | Necroptosis |
| TNFSF10 | Necroptosis |
| TRAF2 | Necroptosis |
| TRIM11 | Necroptosis |
| TSC1 | Necroptosis |
| USP22 | Necroptosis |
| ZBP1 | Necroptosis |
| AIM2 | Pyroptosis |
| BAK1 | Pyroptosis |
| BAX | Pyroptosis |
| CASP1 | Pyroptosis |
| CASP3 | Pyroptosis |
| CASP4 | Pyroptosis |
| CASP5 | Pyroptosis |
| CASP6 | Pyroptosis |
| CASP8 | Pyroptosis |
| CASP9 | Pyroptosis |
| CHMP2A | Pyroptosis |
| CHMP2B | Pyroptosis |
| CHMP3 | Pyroptosis |
| CHMP4A | Pyroptosis |
| CHMP4B | Pyroptosis |
| CHMP4C | Pyroptosis |
| CHMP6 | Pyroptosis |
| CHMP7 | Pyroptosis |
| CYCS | Pyroptosis |
| ELANE | Pyroptosis |
| GPX4 | Pyroptosis |
| GSDMA | Pyroptosis |
| GSDMB | Pyroptosis |
| GSDMC | Pyroptosis |
| GSDMD | Pyroptosis |
| GSDME | Pyroptosis |
| GSMDC | Pyroptosis |
| GZMA | Pyroptosis |
| GZMB | Pyroptosis |
| HMGB1 | Pyroptosis |
| IL18 | Pyroptosis |
| IL1A | Pyroptosis |
| IL1B | Pyroptosis |
| IL6 | Pyroptosis |
| IRF1 | Pyroptosis |
| IRF2 | Pyroptosis |
| NLRC4 | Pyroptosis |
| NLRP1 | Pyroptosis |
| NLRP2 | Pyroptosis |
| NLRP3 | Pyroptosis |
| NLRP6 | Pyroptosis |
| NLRP7 | Pyroptosis |
| NOD1 | Pyroptosis |
| NOD2 | Pyroptosis |
| PJVK | Pyroptosis |
| PLCG1 | Pyroptosis |
| PRKACA | Pyroptosis |
| PYCARD | Pyroptosis |
| SCAF11 | Pyroptosis |
| TIRAP | Pyroptosis |
| TNF | Pyroptosis |
| TP53 | Pyroptosis |
| TP63 | Pyroptosis |
| ABHD5 | Autophagy |
| ABL1 | Autophagy |
| ABL2 | Autophagy |
| ACBD5 | Autophagy |
| ACLY | Autophagy |
| ACP2 | Autophagy |
| ACSL1 | Autophagy |
| ADIPOQ | Autophagy |
| AGT | Autophagy |
| AGER | Autophagy |
| AGTR1 | Autophagy |
| AGTR2 | Autophagy |
| AKT1 | Autophagy |
| AKT2 | Autophagy |
| AKT3 | Autophagy |
| ALB | Autophagy |
| AMBRA1 | Autophagy |
| AMFR | Autophagy |
| ANXA7 | Autophagy |
| APAF1 | Autophagy |
| APOL1 | Autophagy |
| APOL6 | Autophagy |
| APP | Autophagy |
| ARF6 | Autophagy |
| ARSA | Autophagy |
| ARSB | Autophagy |
| ATF4 | Autophagy |
| ATG10 | Autophagy |
| ATG12 | Autophagy |
| ATG13 | Autophagy |
| ATG14 | Autophagy |
| ATG16L1 | Autophagy |
| ATG2A | Autophagy |
| ATG2B | Autophagy |
| ATG3 | Autophagy |
| ATG4A | Autophagy |
| ATG4B | Autophagy |
| ATG4C | Autophagy |
| ATG4D | Autophagy |
| ATG5 | Autophagy |
| ATG7 | Autophagy |
| ATG9 | Autophagy |
| ATG9A | Autophagy |
| ATG9B | Autophagy |
| ATM | Autophagy |
| ATP13A2 | Autophagy |
| AURKA | Autophagy |
| BAD | Autophagy |
| BAG3 | Autophagy |
| BAG6 | Autophagy |
| BAIAP2 | Autophagy |
| BAX | Autophagy |
| BBC3 | Autophagy |
| BCKDHA | Autophagy |
| BCL2 | Autophagy |
| BCL2L1 | Autophagy |
| BCL2L11 | Autophagy |
| BECN1 | Autophagy |
| BECN2 | Autophagy |
| BIRC2 | Autophagy |
| BIRC5 | Autophagy |
| BIRC6 | Autophagy |
| BMF | Autophagy |
| BNIP3 | Autophagy |
| BNIP3L | Autophagy |
| BOK | Autophagy |
| BRCA1 | Autophagy |
| BST2 | Autophagy |
| C19orf12 | Autophagy |
| C9orf72 | Autophagy |
| CALCOCO2 | Autophagy |
| CAMK1 | Autophagy |
| CAMK4 | Autophagy |
| CAMP | Autophagy |
| CAPN1 | Autophagy |
| CAPN10 | Autophagy |
| CAPNS1 | Autophagy |
| CASP1 | Autophagy |
| CASP2 | Autophagy |
| CASP8 | Autophagy |
| CASP9 | Autophagy |
| CAST | Autophagy |
| CAT | Autophagy |
| CATSPER4 | Autophagy |
| CCL2 | Autophagy |
| CCND1 | Autophagy |
| CD38 | Autophagy |
| CD4 | Autophagy |
| CDKN1A | Autophagy |
| CDKN1B | Autophagy |
| CDKN2A | Autophagy |
| CDKN2D | Autophagy |
| CEBPB | Autophagy |
| CFLAR | Autophagy |
| CHEK1 | Autophagy |
| CHMP2A | Autophagy |
| CHMP2B | Autophagy |
| CHMP3 | Autophagy |
| CHMP4A | Autophagy |
| CHMP4B | Autophagy |
| CHMP4C | Autophagy |
| CHMP6 | Autophagy |
| CHRND | Autophagy |
| CHUK | Autophagy |
| CISD1 | Autophagy |
| CISD2 | Autophagy |
| CLEC11A | Autophagy |
| CLEC12A | Autophagy |
| CLN3 | Autophagy |
| CLTC | Autophagy |
| COPZ1 | Autophagy |
| COX5A | Autophagy |
| CSF2 | Autophagy |
| CSHL1 | Autophagy |
| CTNNB1 | Autophagy |
| CTSD | Autophagy |
| CTSL | Autophagy |
| CXCL12 | Autophagy |
| CXCR3 | Autophagy |
| CXCR4 | Autophagy |
| CYB5A | Autophagy |
| CYBB | Autophagy |
| DACT1 | Autophagy |
| DAP | Autophagy |
| DAP3 | Autophagy |
| DAPK1 | Autophagy |
| DAPK2 | Autophagy |
| DAPK3 | Autophagy |
| DCN | Autophagy |
| DDIT3 | Autophagy |
| DDIT4 | Autophagy |
| DENND3 | Autophagy |
| DEPTOR | Autophagy |
| DICER1 | Autophagy |
| DNAJA3 | Autophagy |
| DNM1L | Autophagy |
| DRAM1 | Autophagy |
| DRAM2 | Autophagy |
| DUSP4 | Autophagy |
| DVL2 | Autophagy |
| E2F1 | Autophagy |
| EEF2 | Autophagy |
| EEF2K | Autophagy |
| EGFR | Autophagy |
| EI24 | Autophagy |
| EIF2AK2 | Autophagy |
| EIF2AK3 | Autophagy |
| EIF2B1 | Autophagy |
| EIF2S1 | Autophagy |
| EIF4EBP1 | Autophagy |
| EIF4G1 | Autophagy |
| EIF4G2 | Autophagy |
| ENG | Autophagy |
| EP300 | Autophagy |
| EPG5 | Autophagy |
| EPHB2 | Autophagy |
| EPM2A | Autophagy |
| EPO | Autophagy |
| ERBIN | Autophagy |
| ERFE | Autophagy |
| ERN1 | Autophagy |
| ERN2 | Autophagy |
| EXOC2 | Autophagy |
| FADD | Autophagy |
| FAS | Autophagy |
| FBXL2 | Autophagy |
| FBXL20 | Autophagy |
| FBXO7 | Autophagy |
| Fbxw7as1 | Autophagy |
| FIS1 | Autophagy |
| FKBP1A | Autophagy |
| FLCN | Autophagy |
| FLT3LG | Autophagy |
| FN1 | Autophagy |
| FOXO1 | Autophagy |
| FOXO3 | Autophagy |
| FUNDC1 | Autophagy |
| GAA | Autophagy |
| GAB1 | Autophagy |
| GABARAPL1 | Autophagy |
| GABARAPL2 | Autophagy |
| GABBR2 | Autophagy |
| GATA4 | Autophagy |
| GFER | Autophagy |
| GHRL | Autophagy |
| GJA4 | Autophagy |
| Dsec\GM21596 | Autophagy |
| GNAI3 | Autophagy |
| GNRH2 | Autophagy |
| GOLGA2 | Autophagy |
| GOPC | Autophagy |
| GPR18 | Autophagy |
| GPR182 | Autophagy |
| GPR37 | Autophagy |
| GRID2 | Autophagy |
| GRP | Autophagy |
| GSK3B | Autophagy |
| GTF2IRD2B | Autophagy |
| HDAC1 | Autophagy |
| HDAC10 | Autophagy |
| HDAC2 | Autophagy |
| HDAC6 | Autophagy |
| HERC1 | Autophagy |
| HGS | Autophagy |
| HIF1A | Autophagy |
| HIVEP2 | Autophagy |
| HMGB1 | Autophagy |
| HMOX1 | Autophagy |
| HRAS | Autophagy |
| HSF1 | Autophagy |
| HSP90AA1 | Autophagy |
| HSPA5 | Autophagy |
| HSPA8 | Autophagy |
| HSPB8 | Autophagy |
| HSPG2 | Autophagy |
| HTR2B | Autophagy |
| HTT | Autophagy |
| ICMT | Autophagy |
| IDO1 | Autophagy |
| IFNG | Autophagy |
| IFNGR1 | Autophagy |
| IGF1 | Autophagy |
| IGF1R | Autophagy |
| Igtp | Autophagy |
| Iigp1 | Autophagy |
| IKBKB | Autophagy |
| IKBKG | Autophagy |
| IL11 | Autophagy |
| IL17A | Autophagy |
| IL1B | Autophagy |
| IL2 | Autophagy |
| IL24 | Autophagy |
| IL3 | Autophagy |
| IL33 | Autophagy |
| IL6 | Autophagy |
| INS | Autophagy |
| Ins1 | Autophagy |
| IRGM | Autophagy |
| Irgm1 | Autophagy |
| ITGB4 | Autophagy |
| ITPR1 | Autophagy |
| KAT8 | Autophagy |
| KDM4A | Autophagy |
| KDR | Autophagy |
| KIAA1524 | Autophagy |
| KIF25 | Autophagy |
| KIF5C | Autophagy |
| KRAS | Autophagy |
| KRT18 | Autophagy |
| LACRT | Autophagy |
| LAMP1 | Autophagy |
| LAMP2 | Autophagy |
| LAMP3 | Autophagy |
| LAPTM4B | Autophagy |
| LARP1 | Autophagy |
| LEP | Autophagy |
| LEPR | Autophagy |
| LETM1 | Autophagy |
| LMX1B | Autophagy |
| PRODH | Autophagy |
| LRRK2 | Autophagy |
| LZTS1 | Autophagy |
| MAF1 | Autophagy |
| MAP1LC3A | Autophagy |
| MAP1LC3B | Autophagy |
| MAP1S | Autophagy |
| MAP2K1 | Autophagy |
| MAP2K2 | Autophagy |
| MAP2K4 | Autophagy |
| MAP2K7 | Autophagy |
| MAP3K7 | Autophagy |
| MAPK14 | Autophagy |
| MAPK8 | Autophagy |
| MAPT | Autophagy |
| MBOAT4 | Autophagy |
| MCL1 | Autophagy |
| MCOLN1 | Autophagy |
| MCOLN3 | Autophagy |
| MDM2 | Autophagy |
| MEFV | Autophagy |
| MEGF10 | Autophagy |
| MET | Autophagy |
| MFN1 | Autophagy |
| MFN2 | Autophagy |
| MFSD8 | Autophagy |
| MID2 | Autophagy |
| MITF | Autophagy |
| MMP10 | Autophagy |
| MT3 | Autophagy |
| MTDH | Autophagy |
| MTMR3 | Autophagy |
| MTOR | Autophagy |
| MVB12A | Autophagy |
| MYC | Autophagy |
| MYD88 | Autophagy |
| MYL3 | Autophagy |
| MYOCD | Autophagy |
| NACC1 | Autophagy |
| NAF1 | Autophagy |
| NAMPT | Autophagy |
| NBR1 | Autophagy |
| NCF1 | Autophagy |
| NCR3 | Autophagy |
| NDRG1 | Autophagy |
| NEU3 | Autophagy |
| NFE2L2 | Autophagy |
| NGF | Autophagy |
| NHLRC1 | Autophagy |
| NLRC4 | Autophagy |
| NLRP4 | Autophagy |
| NLRP6 | Autophagy |
| NLRX1 | Autophagy |
| NOD2 | Autophagy |
| NOS1 | Autophagy |
| NOS2 | Autophagy |
| NOS3 | Autophagy |
| NPC1 | Autophagy |
| NQO1 | Autophagy |
| NR1D1 | Autophagy |
| NRBF2 | Autophagy |
| NRBP2 | Autophagy |
| NUPR1 | Autophagy |
| OCRL | Autophagy |
| OPTN | Autophagy |
| OSTM1 | Autophagy |
| PAFAH1B2 | Autophagy |
| PARK2 | Autophagy |
| PCGF1 | Autophagy |
| PDK1 | Autophagy |
| PDK2 | Autophagy |
| PDK4 | Autophagy |
| PGAM5 | Autophagy |
| PIK3C2A | Autophagy |
| PIK3C2B | Autophagy |
| PIK3C3 | Autophagy |
| PIK3CA | Autophagy |
| PIK3CB | Autophagy |
| PIK3R1 | Autophagy |
| PIK3R2 | Autophagy |
| PIM2 | Autophagy |
| PINK1 | Autophagy |
| PIP4K2A | Autophagy |
| PIP4K2B | Autophagy |
| PIP4K2C | Autophagy |
| PKM | Autophagy |
| PLA2G4A | Autophagy |
| PLCE1 | Autophagy |
| PLD1 | Autophagy |
| PLD2 | Autophagy |
| PLEKHF1 | Autophagy |
| PLG | Autophagy |
| PLK2 | Autophagy |
| POLDIP2 | Autophagy |
| POLG | Autophagy |
| PPARG | Autophagy |
| PPFIA4 | Autophagy |
| PRKAA1 | Autophagy |
| PRKAA2 | Autophagy |
| PRKCD | Autophagy |
| PRKCQ | Autophagy |
| PRKD1 | Autophagy |
| PRKDC | Autophagy |
| PRNP | Autophagy |
| PSAP | Autophagy |
| PSEN1 | Autophagy |
| PTEN | Autophagy |
| PTGER2 | Autophagy |
| PTPN22 | Autophagy |
| PYCARD | Autophagy |
| QSOX1 | Autophagy |
| RAB11A | Autophagy |
| RAB12 | Autophagy |
| RAB1A | Autophagy |
| RAB7A | Autophagy |
| RAC3 | Autophagy |
| RALGAPB | Autophagy |
| RAPGEF3 | Autophagy |
| RASD2 | Autophagy |
| RASIP1 | Autophagy |
| RB1 | Autophagy |
| RB1CC1 | Autophagy |
| RELA | Autophagy |
| RGS19 | Autophagy |
| RHEB | Autophagy |
| RIPK1 | Autophagy |
| RNASEL | Autophagy |
| RNF152 | Autophagy |
| RNF5 | Autophagy |
| RNF7 | Autophagy |
| ROCK1 | Autophagy |
| ROCK2 | Autophagy |
| RPS6KB1 | Autophagy |
| RPTOR | Autophagy |
| RRAGA | Autophagy |
| RUBCN | Autophagy |
| RYR2 | Autophagy |
| S100A8 | Autophagy |
| S100A9 | Autophagy |
| S1PR3 | Autophagy |
| SCD | Autophagy |
| SCOC | Autophagy |
| SDHB | Autophagy |
| SERPINA1 | Autophagy |
| SERPINH1 | Autophagy |
| SESN2 | Autophagy |
| SGSM2 | Autophagy |
| SH3BP4 | Autophagy |
| SH3GLB1 | Autophagy |
| SHC1 | Autophagy |
| SIK2 | Autophagy |
| SIRT1 | Autophagy |
| SIRT2 | Autophagy |
| SIRT6 | Autophagy |
| SLC33A1 | Autophagy |
| SMAD2 | Autophagy |
| SMAD4 | Autophagy |
| SMPD1 | Autophagy |
| SMYD3 | Autophagy |
| SNAI1 | Autophagy |
| SNCA | Autophagy |
| SNF8 | Autophagy |
| SNRPE | Autophagy |
| SOAT1 | Autophagy |
| SOD1 | Autophagy |
| SOD2 | Autophagy |
| SOGA1 | Autophagy |
| SORCS2 | Autophagy |
| SOX2 | Autophagy |
| SPHK1 | Autophagy |
| SPP1 | Autophagy |
| SPTLC1 | Autophagy |
| SPTLC2 | Autophagy |
| SPTSSA | Autophagy |
| SQSTM1 | Autophagy |
| SREBF2 | Autophagy |
| Srpx | Autophagy |
| STAM | Autophagy |
| STAM2 | Autophagy |
| STAT1 | Autophagy |
| STIM1 | Autophagy |
| STK11 | Autophagy |
| STK38 | Autophagy |
| STUB1 | Autophagy |
| STX17 | Autophagy |
| SUPT20H | Autophagy |
| SUPT5H | Autophagy |
| SVIP | Autophagy |
| SYNPO2 | Autophagy |
| TAB2 | Autophagy |
| TAB3 | Autophagy |
| TACR2 | Autophagy |
| TAS1R3 | Autophagy |
| TBC1D10A | Autophagy |
| TBC1D10B | Autophagy |
| TBC1D10C | Autophagy |
| TBC1D14 | Autophagy |
| TBC1D16 | Autophagy |
| TBC1D17 | Autophagy |
| TBC1D4 | Autophagy |
| TBC1D5 | Autophagy |
| TBC1D7 | Autophagy |
| TBC1D9 | Autophagy |
| TBC1D9B | Autophagy |
| TBK1 | Autophagy |
| TCHP | Autophagy |
| TCIRG1 | Autophagy |
| TECPR1 | Autophagy |
| TFE3 | Autophagy |
| TFEB | Autophagy |
| TGFB1 | Autophagy |
| THBS2 | Autophagy |
| THPO | Autophagy |
| TICAM1 | Autophagy |
| TICAM2 | Autophagy |
| TIGAR | Autophagy |
| TLR1 | Autophagy |
| TLR3 | Autophagy |
| TLR4 | Autophagy |
| TLR5 | Autophagy |
| TLR6 | Autophagy |
| TLR7 | Autophagy |
| TLR9 | Autophagy |
| TMBIM6 | Autophagy |
| TMEM173 | Autophagy |
| TMEM59 | Autophagy |
| TMEM74 | Autophagy |
| TNF | Autophagy |
| TNFRSF10B | Autophagy |
| TNFSF10 | Autophagy |
| TOP1MT | Autophagy |
| TP53 | Autophagy |
| TP53INP1 | Autophagy |
| TP53INP2 | Autophagy |
| TP63 | Autophagy |
| TP73 | Autophagy |
| TPCN1 | Autophagy |
| TPCN2 | Autophagy |
| TRAF2 | Autophagy |
| TRIB3 | Autophagy |
| TRIM13 | Autophagy |
| TRIM17 | Autophagy |
| TRIM21 | Autophagy |
| TRIM22 | Autophagy |
| TRIM5 | Autophagy |
| TRIM65 | Autophagy |
| TRIM8 | Autophagy |
| TSC1 | Autophagy |
| TSC2 | Autophagy |
| TSG101 | Autophagy |
| TUFM | Autophagy |
| UBASH3B | Autophagy |
| UBB | Autophagy |
| UBQLN1 | Autophagy |
| UBR4 | Autophagy |
| UCP2 | Autophagy |
| ULK1 | Autophagy |
| ULK2 | Autophagy |
| ULK3 | Autophagy |
| USP10 | Autophagy |
| USP13 | Autophagy |
| USP19 | Autophagy |
| USP30 | Autophagy |
| USP33 | Autophagy |
| UVRAG | Autophagy |
| VCP | Autophagy |
| VMP1 | Autophagy |
| VPS13A | Autophagy |
| VPS18 | Autophagy |
| VPS25 | Autophagy |
| VPS28 | Autophagy |
| VPS36 | Autophagy |
| VPS37A | Autophagy |
| VPS37B | Autophagy |
| VPS37C | Autophagy |
| VPS37D | Autophagy |
| VPS39 | Autophagy |
| VPS51 | Autophagy |
| VTI1A | Autophagy |
| VTI1B | Autophagy |
| WAC | Autophagy |
| WASHC1 | Autophagy |
| WDFY3 | Autophagy |
| WDR24 | Autophagy |
| WDR45 | Autophagy |
| WDR6 | Autophagy |
| XBP1 | Autophagy |
| XPO1 | Autophagy |
| YWHAQ | Autophagy |
| ZBTB24 | Autophagy |
| ZC3H12A | Autophagy |
| ZFYVE1 | Autophagy |
| ZKSCAN3 | Autophagy |
| FAM215A | Autophagy |
| ATRAID | Autophagy |
| ARNT | Autophagy |
| ATF6 | Autophagy |
| ATG16L2 | Autophagy |
| ATIC | Autophagy |
| BAG1 | Autophagy |
| BAK1 | Autophagy |
| BID | Autophagy |
| BNIP1 | Autophagy |
| C12orf44 | Autophagy |
| CAMKK2 | Autophagy |
| CANX | Autophagy |
| CAPN2 | Autophagy |
| CASP3 | Autophagy |
| CASP4 | Autophagy |
| CCND3 | Autophagy |
| CCR2 | Autophagy |
| CD46 | Autophagy |
| CTSB | Autophagy |
| CX3CL1 | Autophagy |
| DIRAS3 | Autophagy |
| DLC1 | Autophagy |
| DNAJB1 | Autophagy |
| DNAJB9 | Autophagy |
| EDEM1 | Autophagy |
| ERBB2 | Autophagy |
| ERO1A | Autophagy |
| FAM48A | Autophagy |
| FKBP1B | Autophagy |
| FOS | Autophagy |
| FRAP1 | Autophagy |
| GABARAP | Autophagy |
| GAPDH | Autophagy |
| MLST8 | Autophagy |
| RACK1 | Autophagy |
| GRID1 | Autophagy |
| HSP90AB1 | Autophagy |
| IKBKE | Autophagy |
| ITGA3 | Autophagy |
| ITGA6 | Autophagy |
| ITGB1 | Autophagy |
| JUN | Autophagy |
| KIAA0226 | Autophagy |
| KIF5B | Autophagy |
| KLHL24 | Autophagy |
| MAP1LC3C | Autophagy |
| MAPK1 | Autophagy |
| MAPK10 | Autophagy |
| MAPK3 | Autophagy |
| MAPK8IP1 | Autophagy |
| MAPK9 | Autophagy |
| MBTPS2 | Autophagy |
| MTMR14 | Autophagy |
| NCKAP1 | Autophagy |
| NFKB1 | Autophagy |
| NKX2-3 | Autophagy |
| NRG1 | Autophagy |
| NRG2 | Autophagy |
| NRG3 | Autophagy |
| NRG4 | Autophagy |
| P4HB | Autophagy |
| PARP1 | Autophagy |
| PEA15 | Autophagy |
| PELP1 | Autophagy |
| PEX14 | Autophagy |
| PEX3 | Autophagy |
| PIK3R4 | Autophagy |
| PPP1R15A | Autophagy |
| PRKAB1 | Autophagy |
| PRKAR1A | Autophagy |
| PTK6 | Autophagy |
| PTPN2 | Autophagy |
| RAB24 | Autophagy |
| RAB32 | Autophagy |
| RAB33B | Autophagy |
| RAB5A | Autophagy |
| RAC1 | Autophagy |
| RAF1 | Autophagy |
| RICTOR | Autophagy |
| SAR1A | Autophagy |
| SPNS1 | Autophagy |
| ST13 | Autophagy |
| TM9SF1 | Autophagy |
| EVA1A | Autophagy |
| TUSC1 | Autophagy |
| VAMP3 | Autophagy |
| VAMP7 | Autophagy |
| VEGFA | Autophagy |
| WDR45B | Autophagy |
| WIPI1 | Autophagy |
| WIPI2 | Autophagy |
| AGFG1 | Autophagy |
| AKT1S1 | Autophagy |
| ALPI | Autophagy |
| ALPL | Autophagy |
| AP1AR | Autophagy |
| AP1B1 | Autophagy |
| AP1G1 | Autophagy |
| AP1G2 | Autophagy |
| AP1M1 | Autophagy |
| AP1M2 | Autophagy |
| AP1S1 | Autophagy |
| AP1S2 | Autophagy |
| AP1S3 | Autophagy |
| AP2A1 | Autophagy |
| AP2A2 | Autophagy |
| AP2B1 | Autophagy |
| AP2M1 | Autophagy |
| AP2S1 | Autophagy |
| ARHGAP26 | Autophagy |
| ARL2 | Autophagy |
| ATG101 | Autophagy |
| BCR | Autophagy |
| BDNF | Autophagy |
| CAPN11 | Autophagy |
| CAPN12 | Autophagy |
| CAPN13 | Autophagy |
| CAPN14 | Autophagy |
| CAPN3 | Autophagy |
| CAPN5 | Autophagy |
| CAPN6 | Autophagy |
| CAPN7 | Autophagy |
| CAPN8 | Autophagy |
| CAPN9 | Autophagy |
| CAPNS2 | Autophagy |
| CLTA | Autophagy |
| CLTB | Autophagy |
| CSNK2A1 | Autophagy |
| CSNK2B | Autophagy |
| CTSV | Autophagy |
| DNM1 | Autophagy |
| DNM2 | Autophagy |
| DNM3 | Autophagy |
| EEF1A1 | Autophagy |
| EIF2AK1 | Autophagy |
| EIF2AK4 | Autophagy |
| EIF4E | Autophagy |
| EIF4EBP2 | Autophagy |
| EIF4EBP3 | Autophagy |
| EXOC1 | Autophagy |
| EXOC3 | Autophagy |
| EXOC4 | Autophagy |
| EXOC5 | Autophagy |
| EXOC6 | Autophagy |
| EXOC7 | Autophagy |
| EXOC8 | Autophagy |
| FKBP8 | Autophagy |
| GFAP | Autophagy |
| GLIPR2 | Autophagy |
| GRB2 | Autophagy |
| HARBI1 | Autophagy |
| INSR | Autophagy |
| IRS1 | Autophagy |
| IRS2 | Autophagy |
| IRS4 | Autophagy |
| ITPR2 | Autophagy |
| ITPR3 | Autophagy |
| KEAP1 | Autophagy |
| LRSAM1 | Autophagy |
| MAP3K14 | Autophagy |
| MAP4K3 | Autophagy |
| MAPKAP1 | Autophagy |
| NCOA4 | Autophagy |
| NFKBIA | Autophagy |
| NFKBIB | Autophagy |
| NFKBID | Autophagy |
| NFKBIE | Autophagy |
| NFKBIZ | Autophagy |
| NOD1 | Autophagy |
| NRAS | Autophagy |
| OPA1 | Autophagy |
| PAK1 | Autophagy |
| PDPK1 | Autophagy |
| PEX5 | Autophagy |
| PLCG1 | Autophagy |
| PPP2CA | Autophagy |
| PPP2CB | Autophagy |
| PPP2R1A | Autophagy |
| PPP2R1B | Autophagy |
| PPP2R2B | Autophagy |
| PPP2R2C | Autophagy |
| PPP2R2D | Autophagy |
| PPP2R3A | Autophagy |
| PPP2R3B | Autophagy |
| PPP2R3C | Autophagy |
| PTPA | Autophagy |
| PPP2R5A | Autophagy |
| PPP2R5B | Autophagy |
| PPP2R5C | Autophagy |
| PPP2R5D | Autophagy |
| PPP2R5E | Autophagy |
| PRKCA | Autophagy |
| PRKCB | Autophagy |
| PRKCG | Autophagy |
| PRR5 | Autophagy |
| RALA | Autophagy |
| RALB | Autophagy |
| RCAN1 | Autophagy |
| RRAGB | Autophagy |
| RRAGC | Autophagy |
| RRAGD | Autophagy |
| RUNX1 | Autophagy |
| SESN1 | Autophagy |
| SIDT2 | Autophagy |
| SIN3A | Autophagy |
| SIN3B | Autophagy |
| SLC1A5 | Autophagy |
| SLC3A2 | Autophagy |
| SLC7A5 | Autophagy |
| SNAP29 | Autophagy |
| SOS1 | Autophagy |
| STX7 | Autophagy |
| STX8 | Autophagy |
| TBC1D25 | Autophagy |
| TELO2 | Autophagy |
| TOMM7 | Autophagy |
| TRADD | Autophagy |
| TRAF1 | Autophagy |
| TRAF6 | Autophagy |
| TRAPPC1 | Autophagy |
| TRAPPC10 | Autophagy |
| TRAPPC2 | Autophagy |
| TRAPPC3 | Autophagy |
| TRAPPC4 | Autophagy |
| TRAPPC5 | Autophagy |
| TRAPPC6A | Autophagy |
| TRAPPC8 | Autophagy |
| TRAPPC9 | Autophagy |
| UBC | Autophagy |
| UBE2A | Autophagy |
| UBE2D2 | Autophagy |
| UBE2D3 | Autophagy |
| UBE2L3 | Autophagy |
| UBE2N | Autophagy |
| VAMP8 | Autophagy |
| VDAC1 | Autophagy |
| VDAC2 | Autophagy |
| VDAC3 | Autophagy |
| VPS16 | Autophagy |
| VPS33A | Autophagy |
| VPS41 | Autophagy |

Supplementary Table 2: Primer sequences for qRT-PCR.

| Gene | Species | Forward primers | Reverse primers |
| --- | --- | --- | --- |
| TIMP1 | Homo | CTTCTGCAATTCCGACCTCGT | ACGCTGGTATAAGGTGGTCTG |
| TIMP2 | Homo | GCTGCGAGTGCAAGATCAC | TGGTGCCCGTTGATGTTCTTC |
| TIMP3 | Homo | CATGTGCAGTACATCCATACGG | CATCATAGACGCGACCTGTCA |
| IL6 | Homo | ACTCACCTCTTCAGAACGAATTG | CCATCTTTGGAAGGTTCAGGTTG |
| CCL2 | Homo | CAGCCAGATGCAATCAATGCC | TGGAATCCTGAACCCACTTCT |
| GAPDH | Homo | GTCTCCTCTGACTTCAACAGCG | ACCACCCTGTTGCTGTAGCCAA |
| TIMP1 | Mus | CGAGACCACCTTATACCAGCG | ATGACTGGGGTGTAGGCGTA |
| TIMP2 | Mus | GCAACCCCATCAAGAGGATTC | GGGGCCGTGTAGATAAACTCG |
| TIMP3 | Mus | GAAGCCTCTGAAAGTCTTTGTGG | ACATCTTGCCTTCATACACGC |
| IL6 | Mus | TCTATACCACTTCACAAGTCGGA | GAATTGCCATTGCACAACTCTTT |
| CCL2 | Mus | TTAAAAACCTGGATCGGAACCAA | GCATTAGCTTCAGATTTACGGGT |
| GAPDH | Mus | TGACCTCAACTACATGGTCTACA | CTTCCCATTCTCGGCCTTG |

Supplementary Table 3: The main clinical characteristics of UC patients and healthy controls involved in our study.

| Characteristics | UC patients (n=12) | Healthy controls (n=12) |
| --- | --- | --- |
| Sex (male/female) | 8/4 | 7/5 |
| Age (years, mean ± SEM) | 47 ± 4.13 | 45 ± 4.03 |
| HGB, g/L, median (IQR) | 108（89，127.75） |  |
| PLT, x 109 L, median (IQR) | 240（209.5，297.50） |  |
| Albumin, g/L, median (IQR) | 34.9（30.48，37.78） |  |
| ESR, mm/H, median (IQR) | 32.50（7.25，64.25） |  |
| CRP, mg/L, median (IQR) | 19.80（2.95，42.50） |  |
| UCEIS, median (IQR) | 7.00（5.00，8.00） |  |

**Abbreviations**: HGB, Hemoglobin; PLT, platelet; ESR, erythrocyte sedimentation rate; CRP, C-reactive protein; UCEIS, Ulcerative Colitis Endoscopic Index of Severity; SEM, Standard Error of the Mean; IQR, Interquartile Range.

Supplementary Box 1: The summary of 71 PANoptosis-related DEGs and 113 autophagy-related DEGs.

PANoptosis-related DEGs:

AIFM3, AIM2, ANXA1, AXL, BCL2L11, BGN, BIRC3, BTG2, BTG3, CASP1, CASP5, CAV1, CD2, CD38, CD40, CD44, CDC25B, CDKN2A, CFLAR, CHMP2B, CHMP3, CHMP4C, CLU, CTH, CYCS, DCN, EGR3, ERBB3, F2R, FEZ1, GADD45B, GNA15, GPX1, GPX3, GSN, GZMB, HGF, IDH1, IDH2, IFITM3, IGFBP6, IL1B, IL6, IRF1, ISG20, LEF1, LUM, LY96, MCL1, MLKL, MMP2, NEDD9, PAK1, PDCD4, PDGFRB, PEA15, PLAT, PRF1, RHOB, SLC20A1, SOD2, STAT3, TAP1, TARDBP, TGFB2, TIMP1, TIMP2, TIMP3, TNFRSF1B, TNFRSF21, ZBP1.

Autophagy- related DEGs:

ACSL1, AGT, AKT1S1, ALPI, ALPL, APOL1, ARSA, ATG14, BAG1, BCL2L11, BIRC5, BST2, CAPN13, CAPN5, CAPN9, CASP1, CCL2, CD38, CD4, CDKN2A, CEBPB, CFLAR, CHMP2B, CHMP3, CHMP4C, CLEC11A, CTSB, CXCL12, CXCR4, DCN, DDIT4, DLC1, DNAJB9, DRAM1, DUSP4, EIF4EBP2, EIF4G2, ENG, ERBIN, FKBP8, GAB1, GJA4, GSK3B, HIF1A, HSF1, HSPG2, IDO1, IL1B, IL33, IL6, INSR, KDR, KIF5C, KLHL24, KRAS, LAMP3, MCL1, MMP10, NAMPT, NOS2, NQO1, NRG1, OCRL, OPA1, OPTN, P4HB, PAK1, PDK1, PEA15, PIM2, PKM, PLCE1, PLD1, PPARG, PPP2R3A, PPP2R3C, PRKAA1, PRKCB, PRNP, RAB11A, RAPGEF3, RASIP1, RGS19, RNF152, RUNX1, S100A8, S100A9, S1PR3, SERPINA1, SERPINH1, SLC7A5, SMAD2, SOD2, SPHK1, SPP1, STAT1, STX7, TBC1D10C, TCIRG1, TFE3, TGFB1, THBS2, TLR1, TLR4, TM9SF1 TRAF1, TRIM8, UBE2D3, UCP2, USP30, VPS13A, XBP1, ZC3H12A.

**Abbreviations**: DEGs, differentially expressed genes.
